# Supplementary material
Source: Springer Nature journal article supplement (https://www.springermedizin.de/resource/supplementary/12936_2012_2780_MOESM2_ESM.pdf/9544528)
Supplement: MOESM2 [file 9544528]

$$V_p(t) = \begin{cases} V_p(t-1) + Ro(t) - I(t) - E(t) + Rf(t) & \text{if } h < h_{max} \\ V_p(t) & \text{otherwise} \end{cases}$$

Where

$t$  = time

$V_p$  = volume of the puddle ( $m^3$ )

$Ro$  = Run-off to+ the puddle ( $m^3$ )

$I$  = infiltration ( $m^3$ )

$E$  = evaporation ( $m^3$ )

$Rf$  = rainfall ( $m^3$ )

$h$  = depth of puddle ( $m$ )

$h_{max}$  = maximum depth of puddle ( $m$ )
